# Supplementary material
Source: Springer Nature journal article supplement (https://www.springermedizin.de/resource/supplementary/13054_2011_9900_MOESM3_ESM.pdf/9708440)

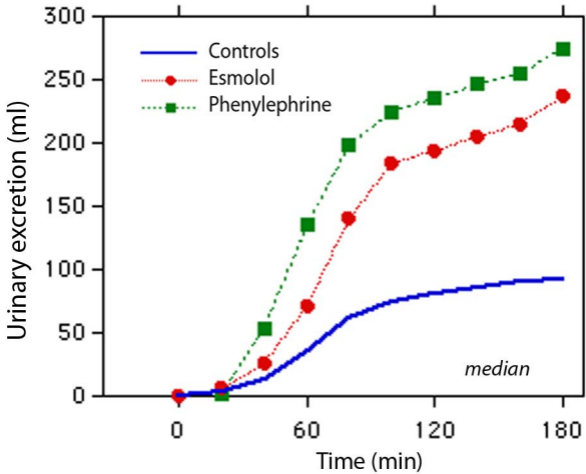

Supplement: MOESM3 [file 9708440]
